# Supplementary material for: Uniquely sized nanogels via crosslinking polymerization
Source: Royal Society of Chemistry journal article supplement (doi:10.1039/d2ra04123e), 2022-01-01
Supplement: d2ra04123e1.pdf [file d2ra04123e1.pdf]

## Supplementary data

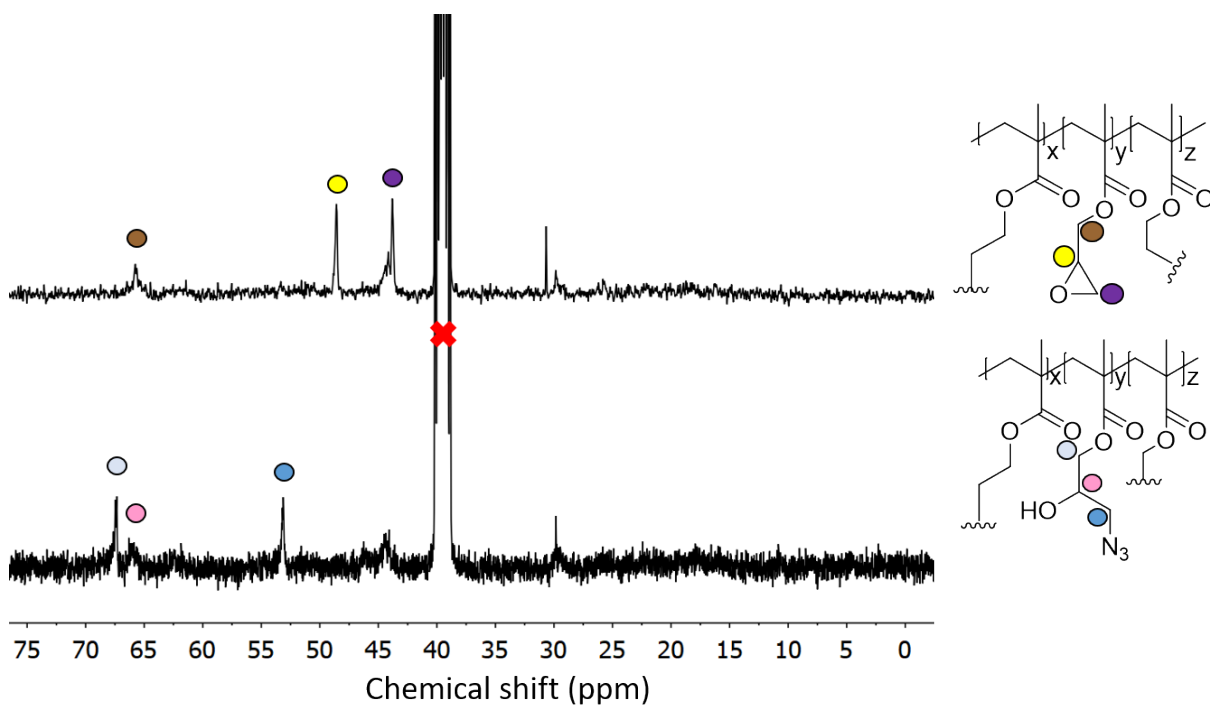

Fig. S1 Zoomed in  $^{13}\text{C}$  NMR spectrum of GMA-EGDMA- $\text{N}_3$  (bottom) in  $\text{DMSO-d}_6$  indicates the presence of C- $\text{N}_3$  bonds at  $\delta = 53$  ppm.

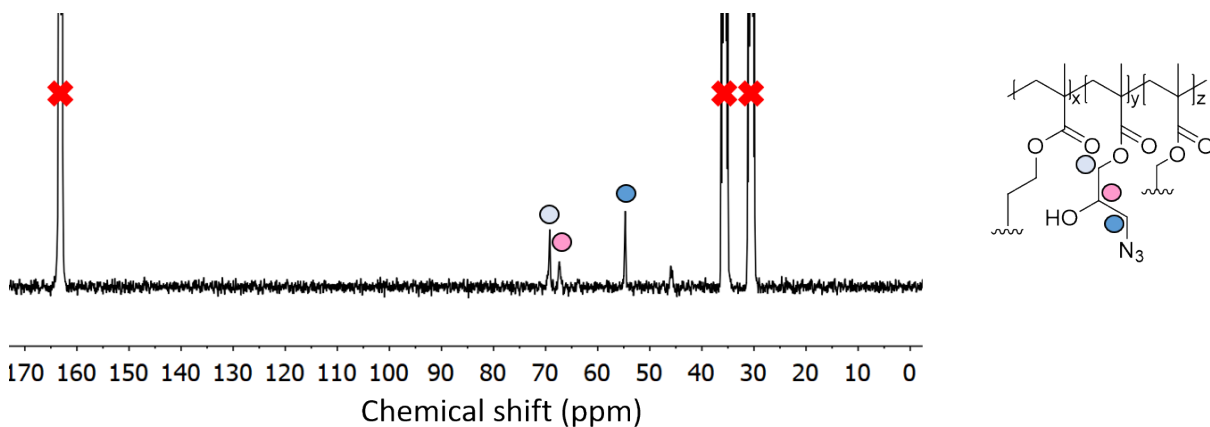

Fig. S2  $^{13}\text{C}$  NMR spectrum of GMA-EGDMA- $\text{N}_3$  in  $\text{DMF-d}_7$  indicates the presence of C- $\text{N}_3$  bonds at  $\delta = 55$  ppm.
